# Supplementary material for: Bioinspired pomegranate-like microflowers confining core-shell binary NixSy nanobeads for efficient supercapacitors exhibiting a durable lifespan exceeding 100 000 cycles
Source: Royal Society of Chemistry journal article supplement (doi:10.1039/c8ta11489g), 2019-01-01
Supplement: c8ta11489g1.pdf [file c8ta11489g1.pdf]

## Supporting Information

### **Bioinspired Pomegranate-like Microflowers Confining Core-shell Binary $\text{Ni}_x\text{S}_y$ Nanobeads for Efficient Supercapacitors Exhibiting Durable Lifespan Exceeding 100 000 circles**

*Cheng Yang, Minjie Shi, Yuyu Tian, Jun Yang, Xuefeng Song, \* Liping Zhao, Jing Liu, Peng Zhang, Lian Gao\**

C. Yang, Y. Y. Tian, Prof. X. F. Song, Prof. L. P. Zhao, Prof. J. Liu, Prof. P. Zhang, Prof. L. Gao

State Key Laboratory for Metallic Matrix Composite Materials, School of Materials Science and Engineering, Shanghai Jiao Tong University, Shanghai 200240, P. R. China

Dr. M. J. Shi

School of Materials Science and Engineering, Jiangsu University of Science and Technology, Zhenjiang, 212003, P. R. China.

Prof. J. Yang

Shanghai Electrochemical Energy Devices Research Center, School of Chemistry and Chemical Engineering, Shanghai Jiao Tong University, Shanghai 200240, P. R. China

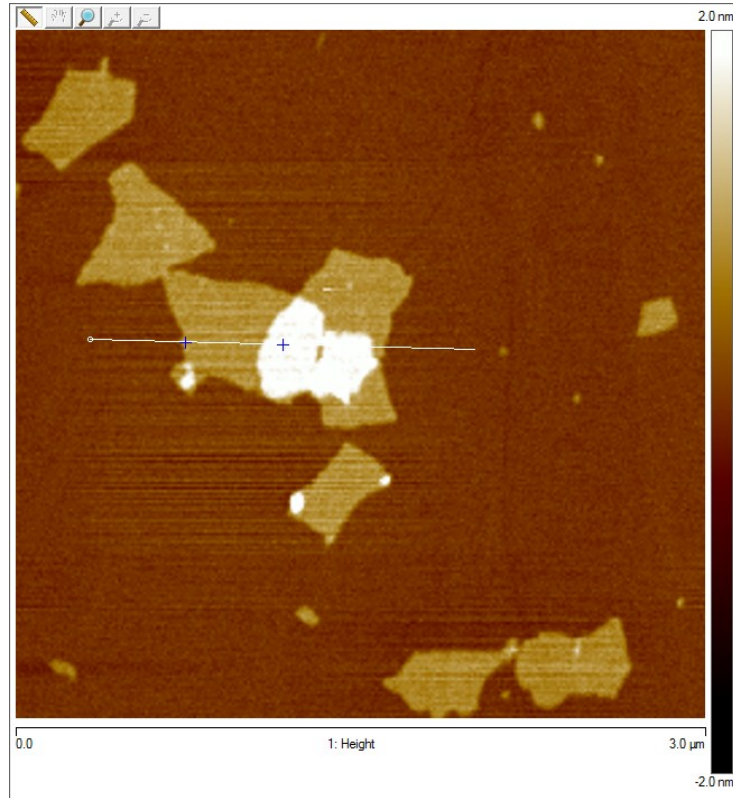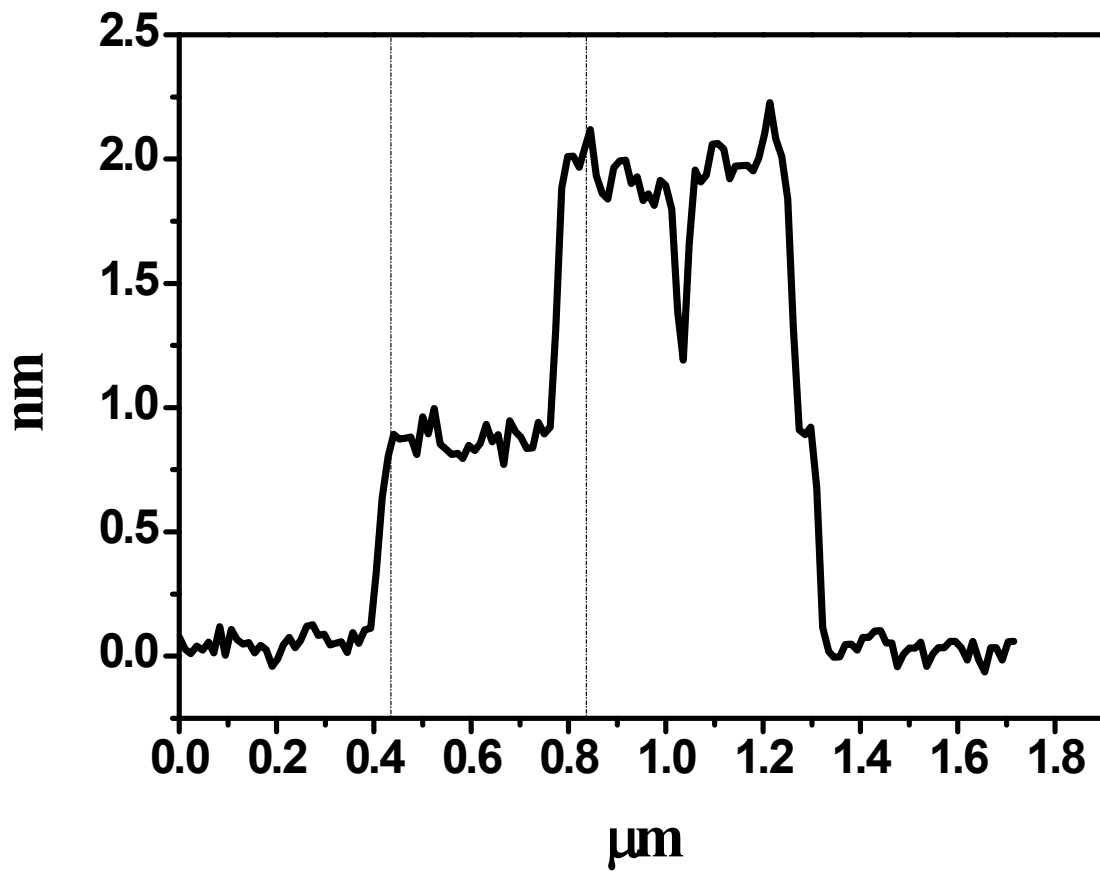

**Fig. S1.** The atomic force microscope (AFM) image of graphene oxide sheets. The thickness of graphene nanosheets is about 0.48 nm.

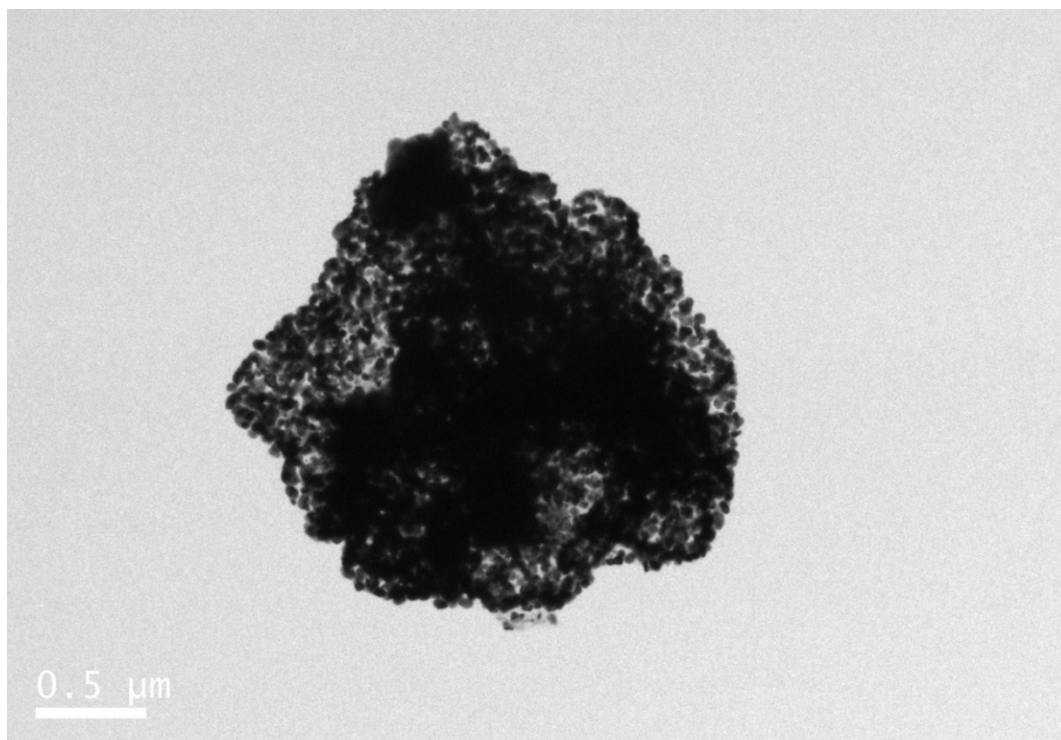

Fig. S2. TEM image of Ni@G.

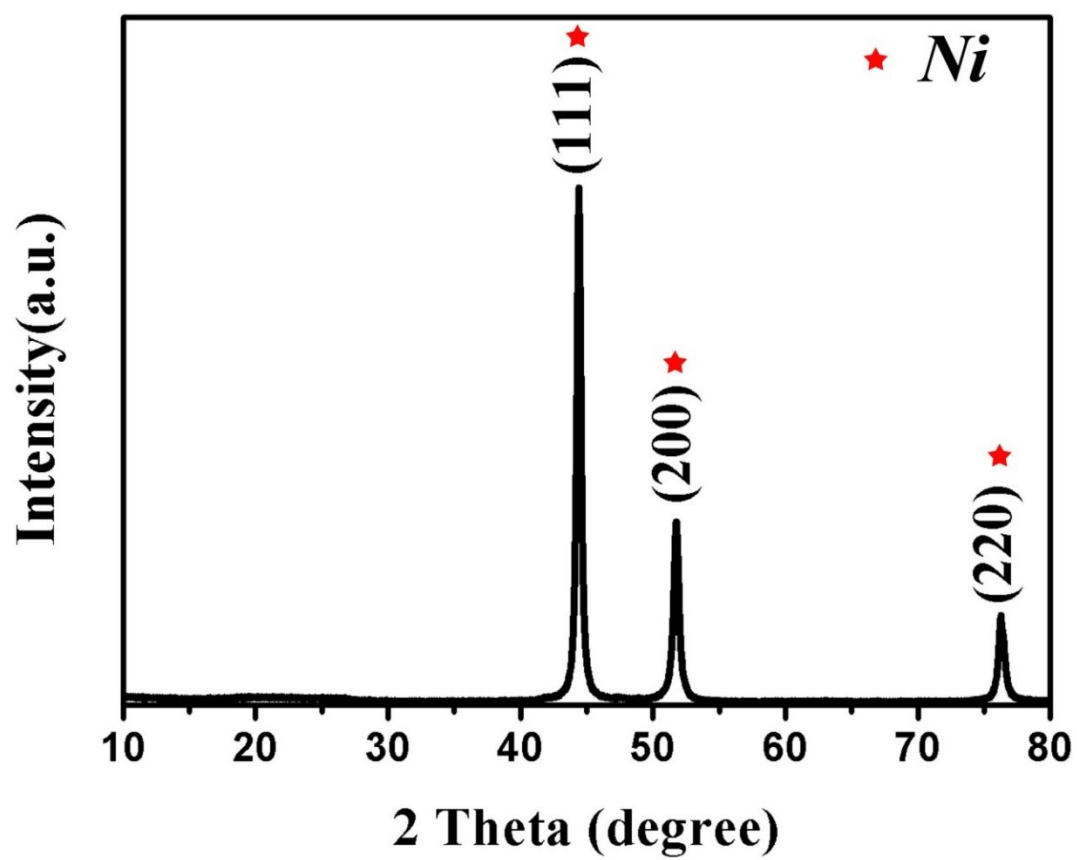

Fig. S3. XRD pattern of Ni@G.

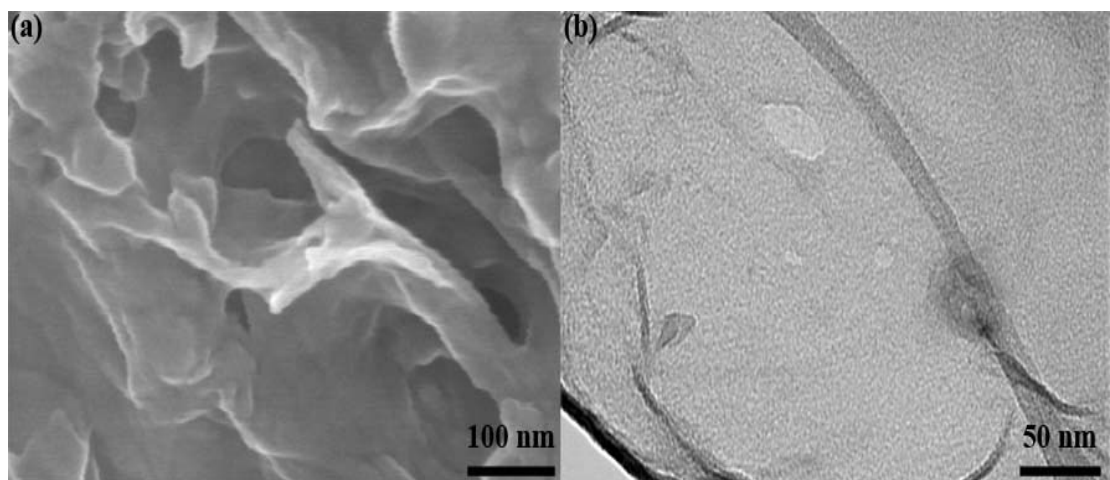

**Fig. S4.** (a) FESEM and (b) TEM images of porous graphene microspheres.

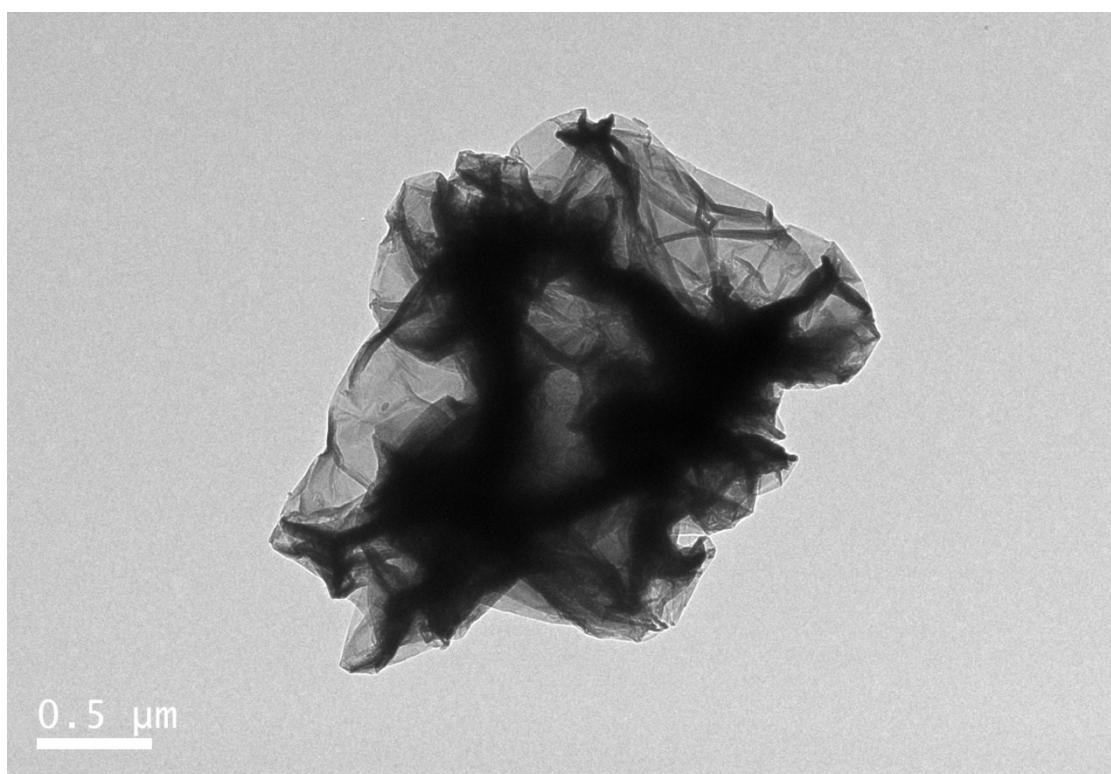

**Fig. S5.** TEM image of pristine graphene microspheres.

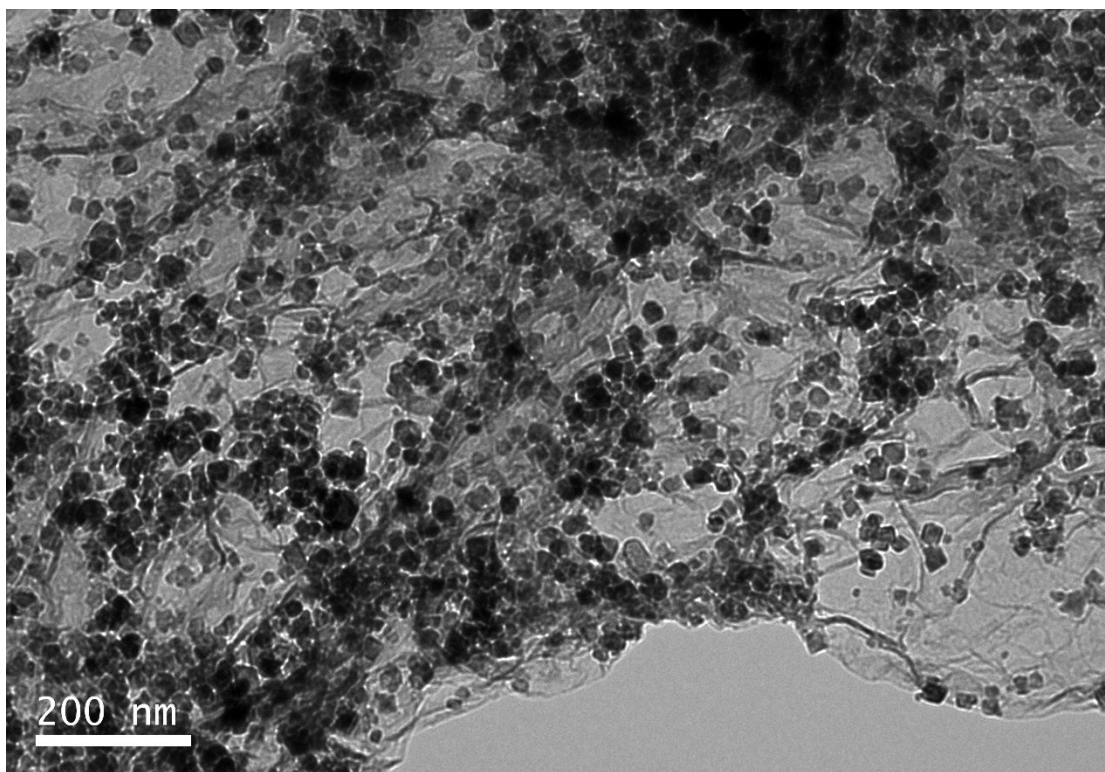

**Fig. S6.** TEM image of DM-Ni<sub>x</sub>S<sub>y</sub>@G.

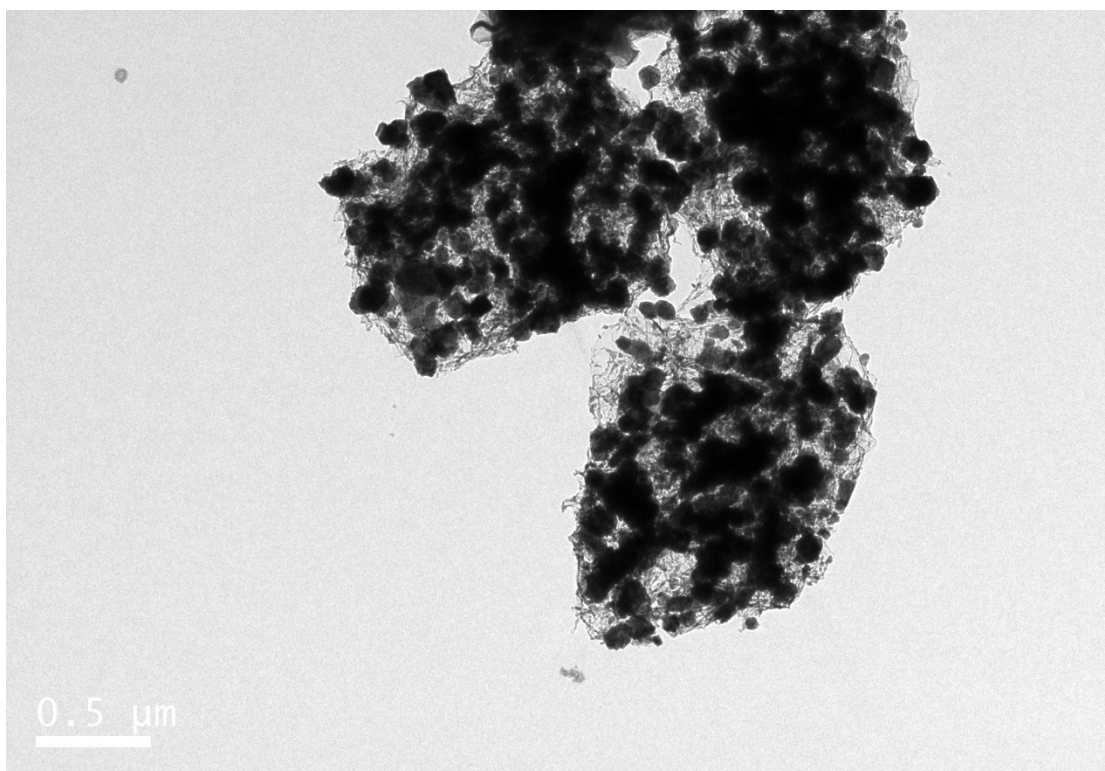

**Fig. S7.** TEM image of NiS@G.

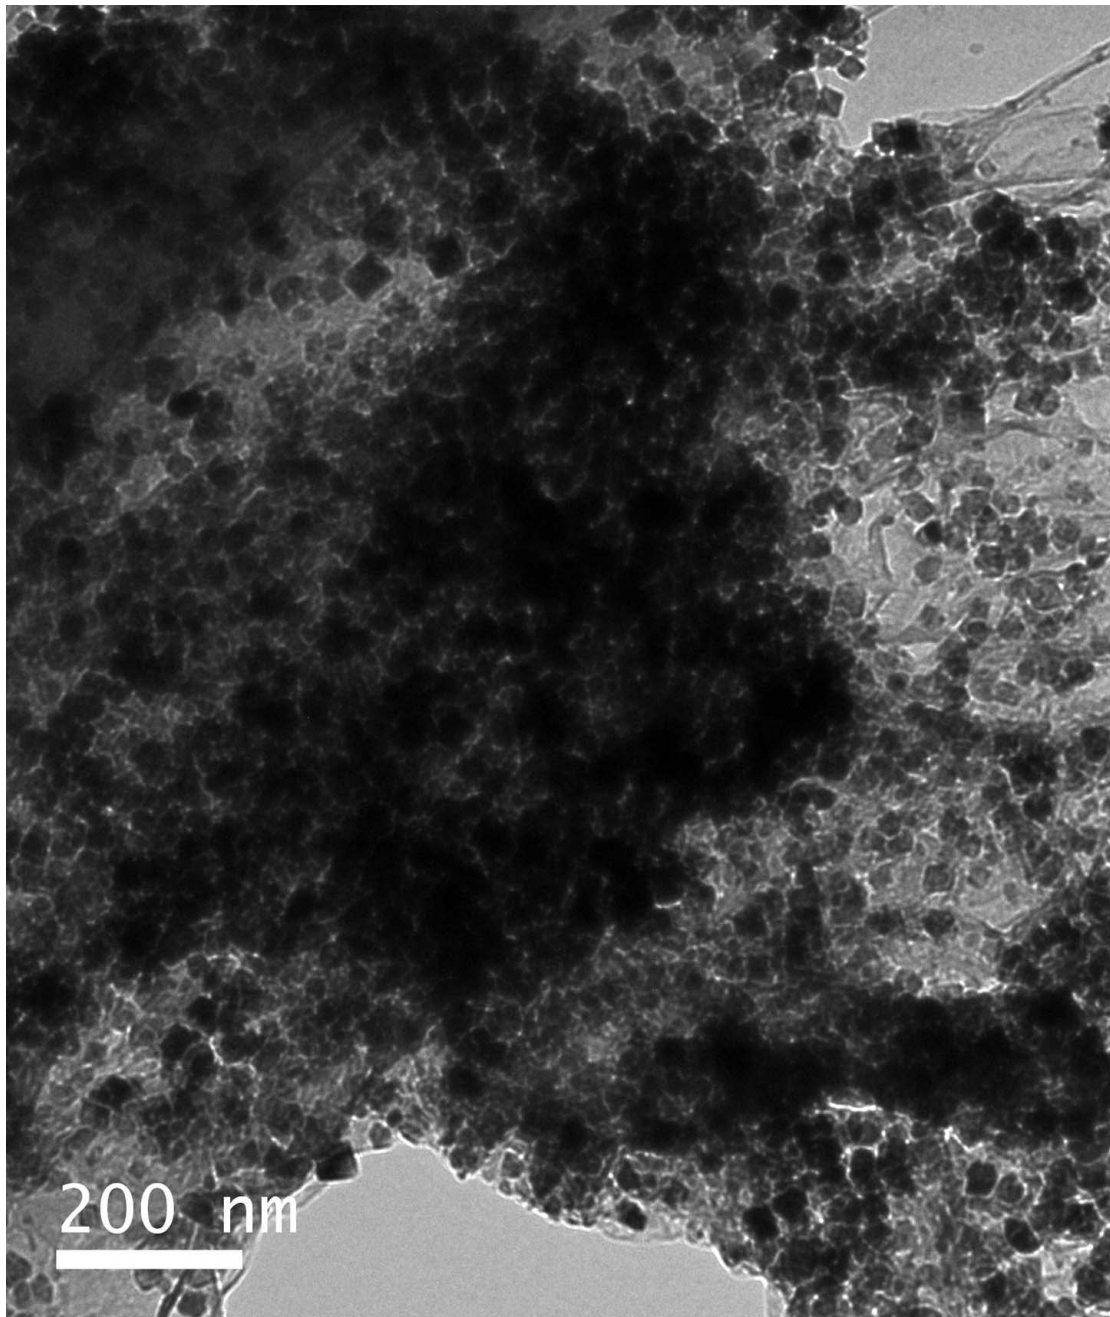

**Fig. S8.** TEM image of DM-Ni<sub>x</sub>S<sub>y</sub>@G electrodes after 100000 charge-discharge cycles at 5 A/g.

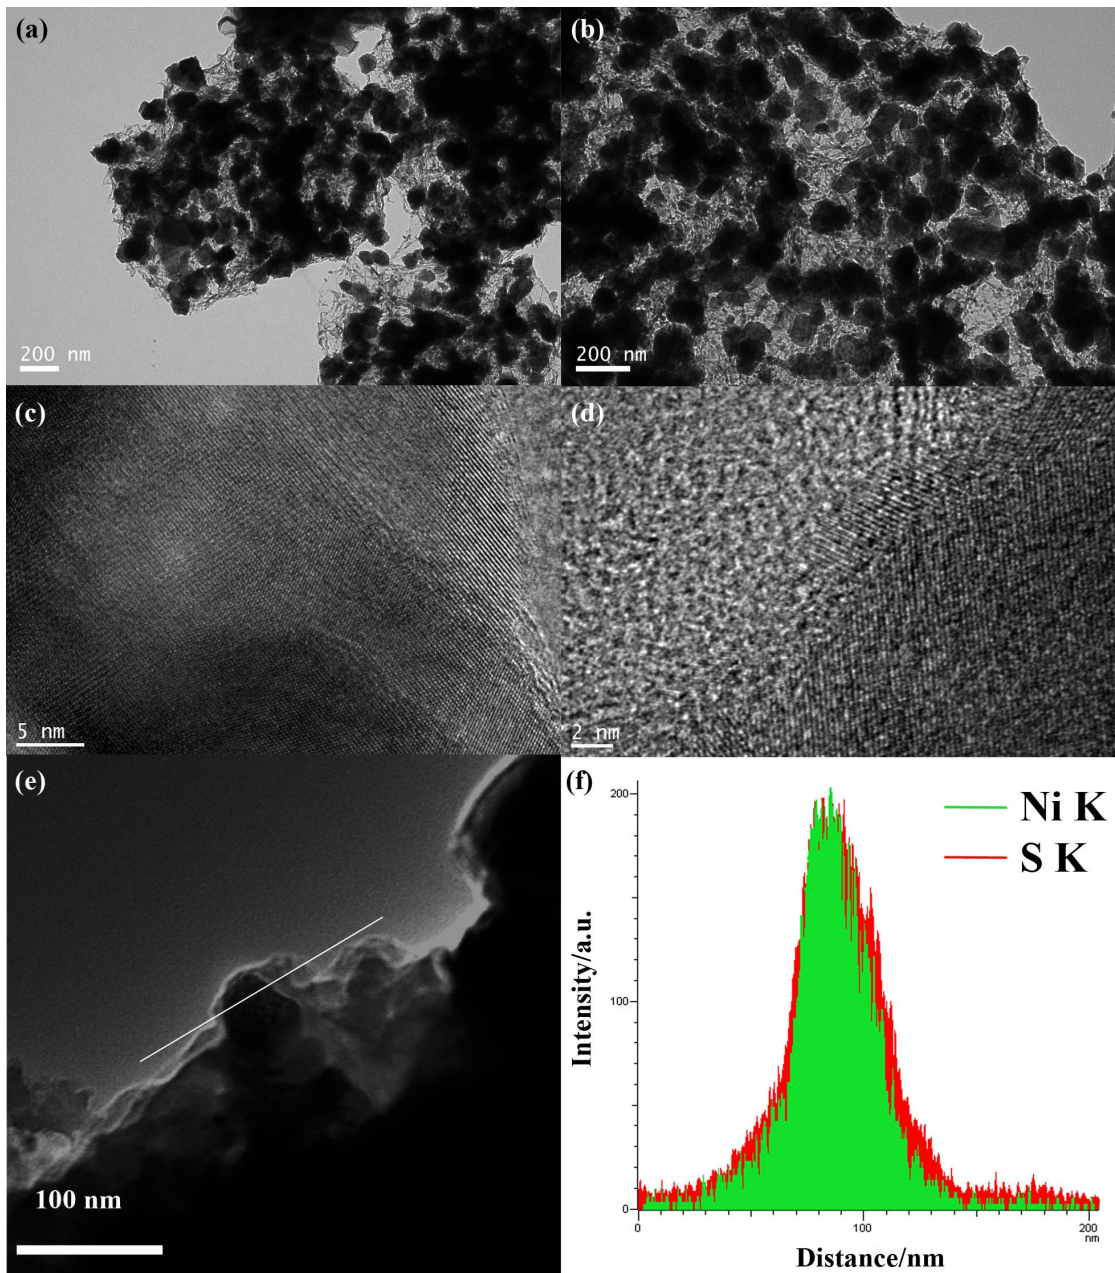

**Fig. S9.** (a, b) TEM images, (c, d) HRTEM images of PM-Ni<sub>x</sub>S<sub>y</sub> microflowers. (e) scanning transmission electron microscopy image for STEM/EDS line scan, (f) STEM/EDS line scan profile of binary Ni<sub>x</sub>S<sub>y</sub> nanobeads in PM-Ni<sub>x</sub>S<sub>y</sub> microflowers.

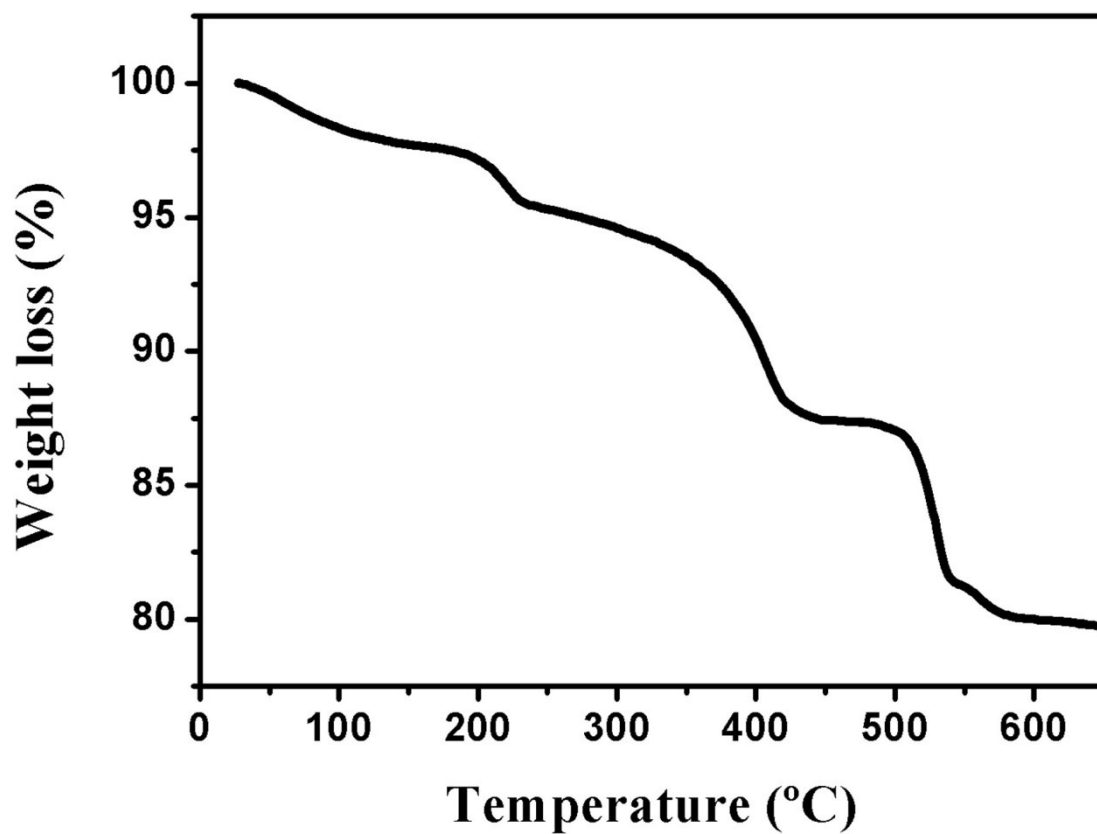

**Fig. S10.** TGA curve of PM-Ni<sub>x</sub>S<sub>y</sub> microflowers ranging from 25 to 650 °C at a heating rate of 10 °C /min under air flow.



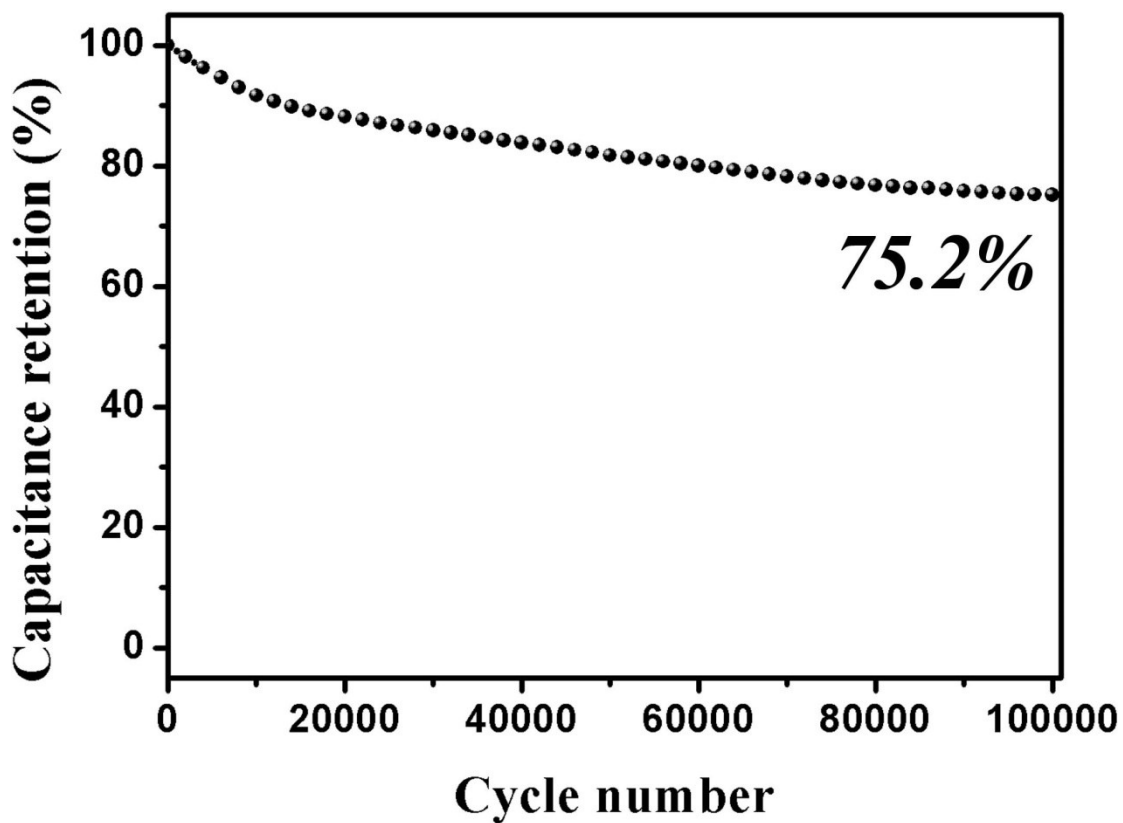

Fig. S11. Cycle performance of the DM-Ni<sub>x</sub>S<sub>y</sub>@G electrodes.

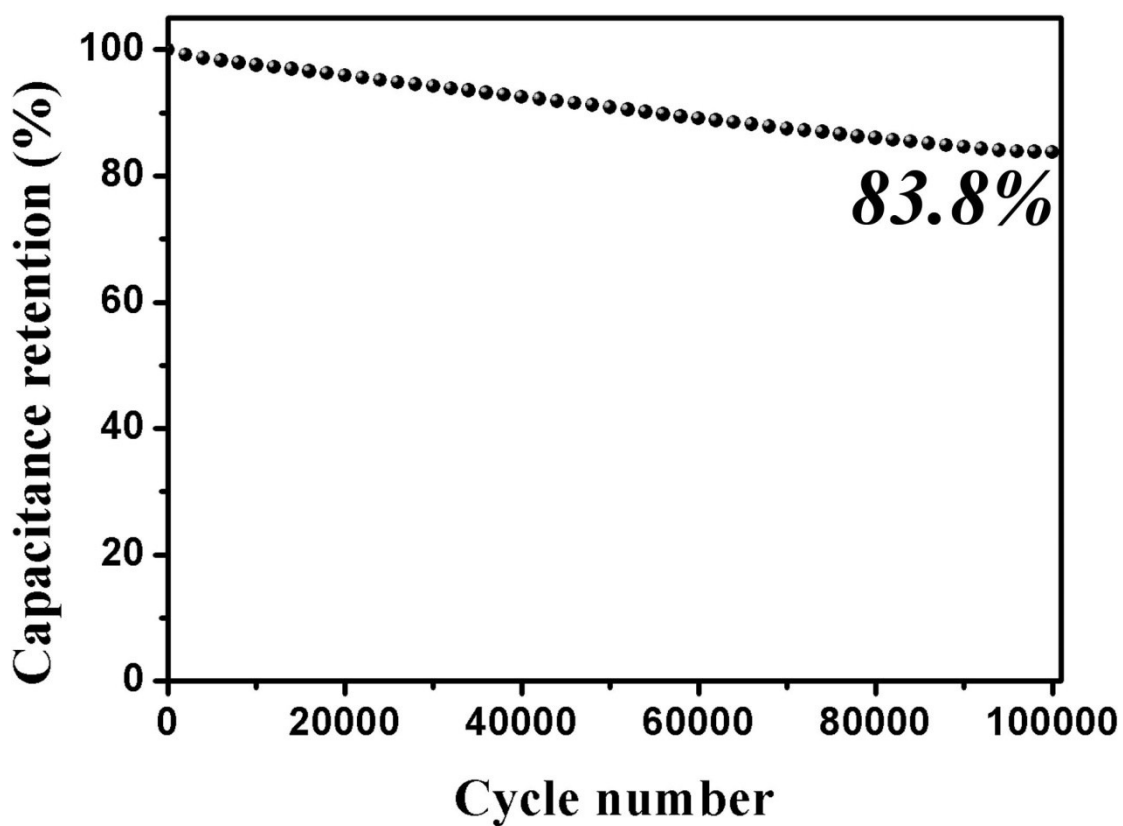

Fig. S12. Cycle performance of the NiS@G electrodes.

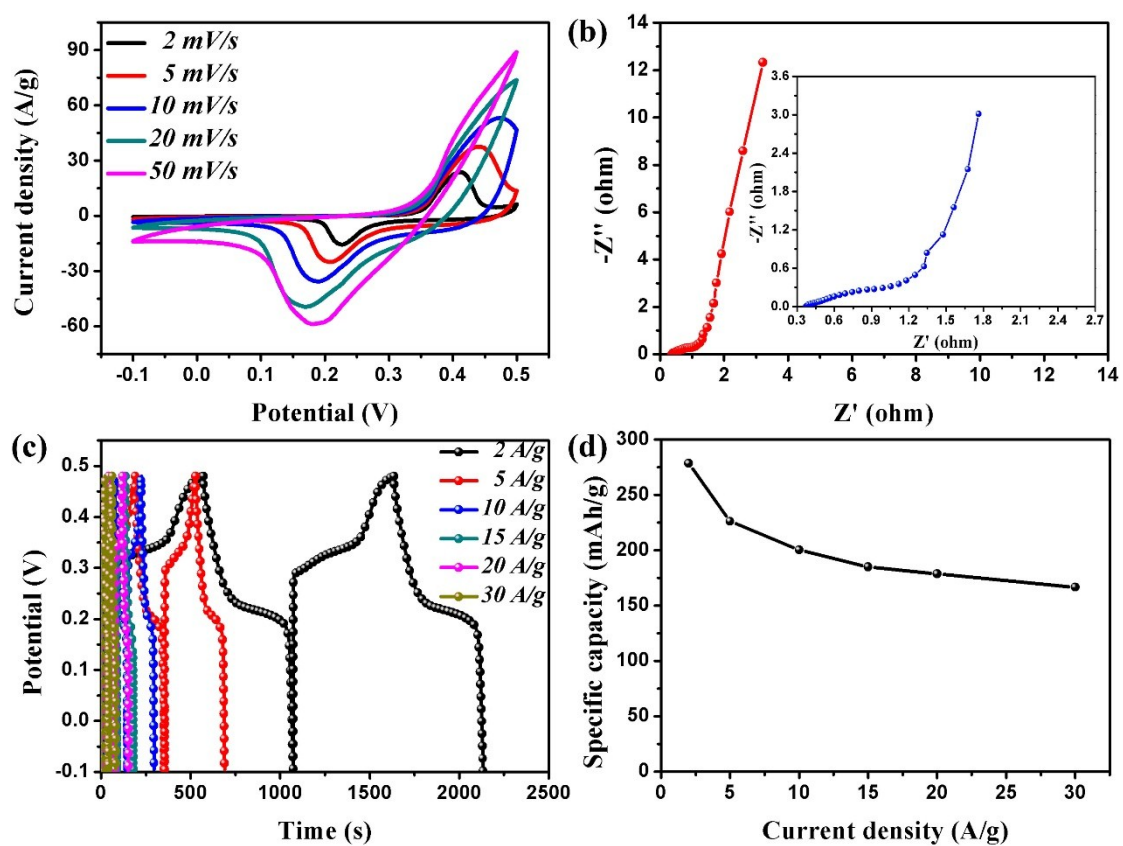

**Fig. S13.** (a) CV curves at scan rates of 2-50 mV/s; (b) EIS plot; (c) GCD curves; (d) specific capacity at different current densities of 2-30 A/g of DM-Ni<sub>x</sub>S<sub>y</sub>@G electrodes.

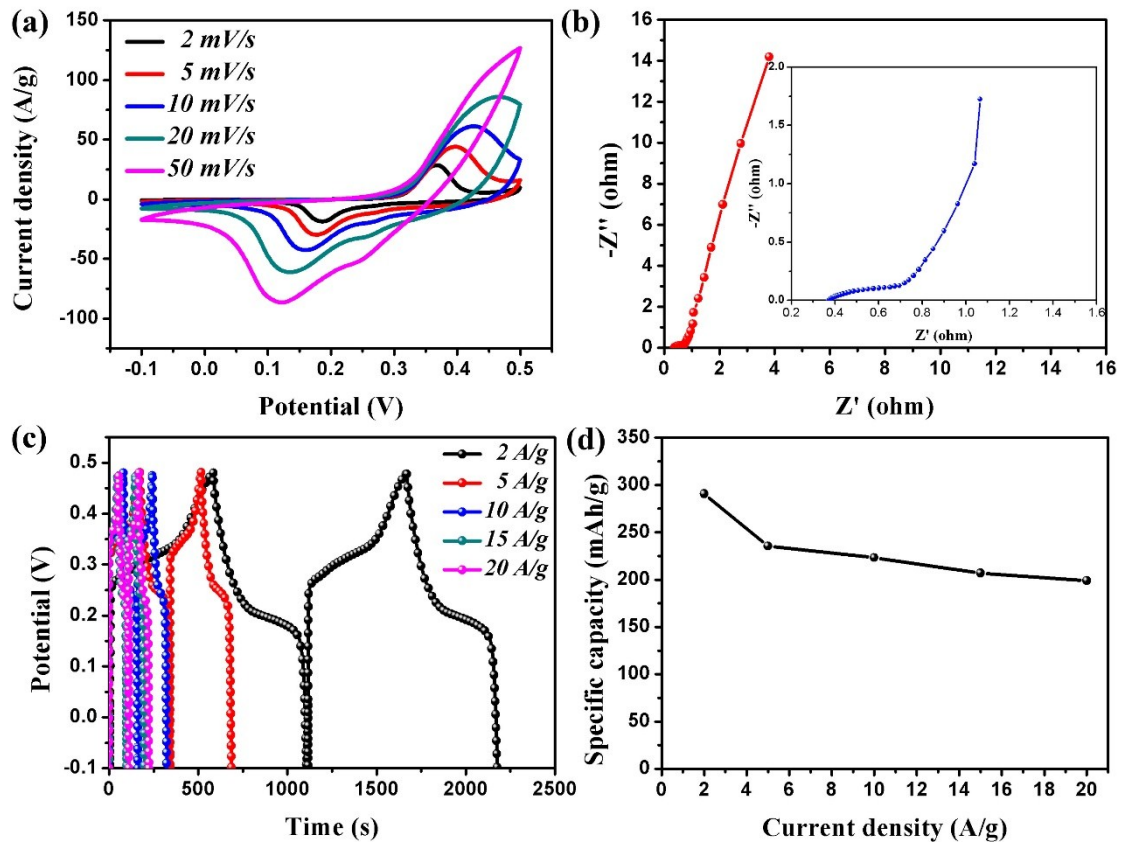

**Fig. S14.** (a) CV curves at scan rates of 2-50 mV/s; (b) EIS plot; (c) GCD curves; (d) specific capacity at different current densities of 2-20 A/g of NiS@G electrodes.

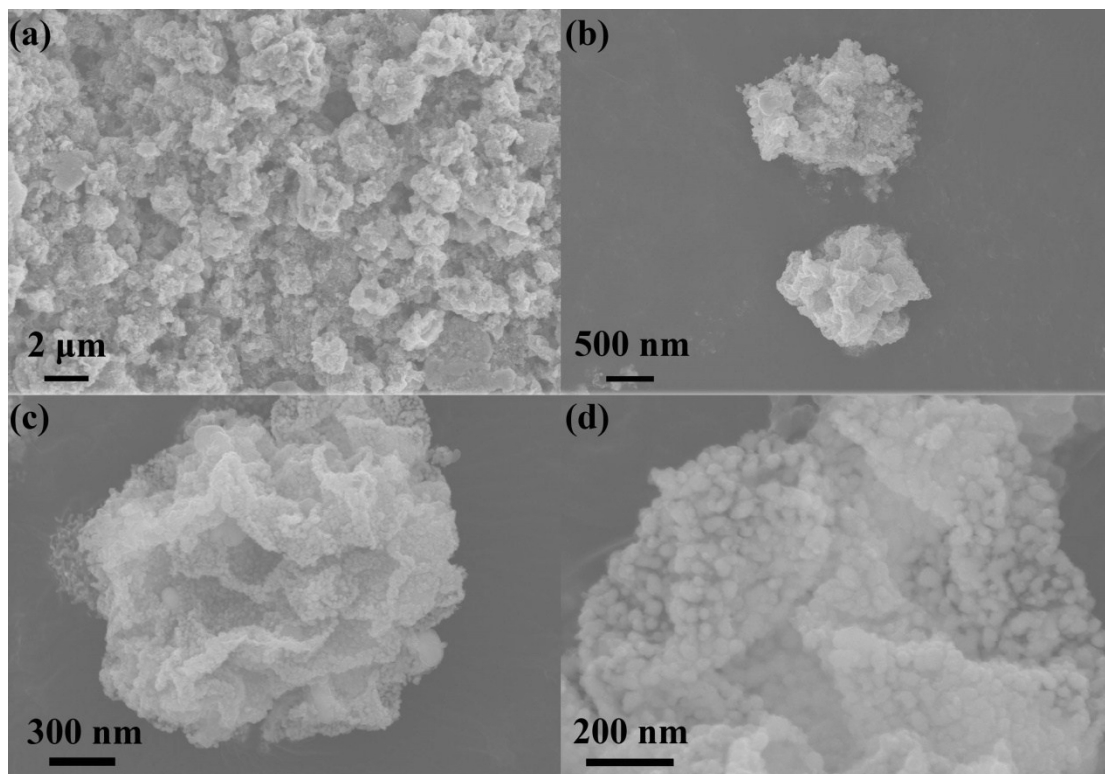

**Fig. S15.** SEM image of PM-Ni<sub>x</sub>S<sub>y</sub> electrodes after 100 000 charge-discharge cycles at 5 A/g.

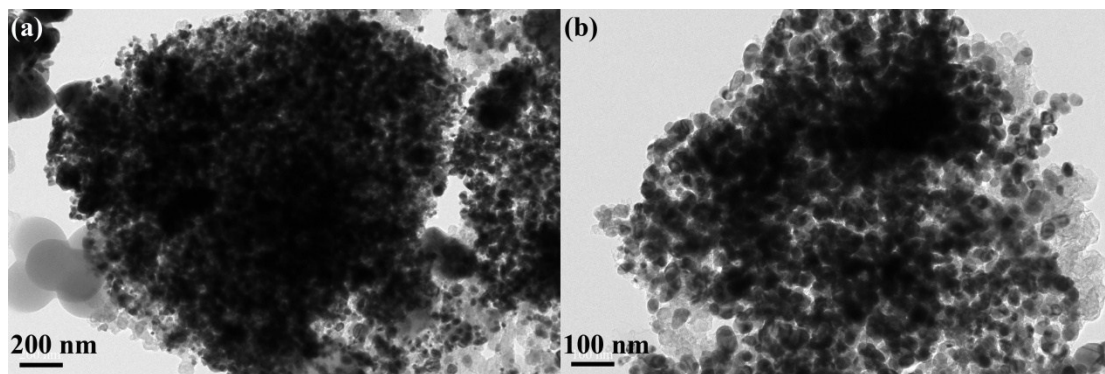

**Fig. S16.** TEM image of PM-Ni<sub>x</sub>S<sub>y</sub> electrodes after 100 000 charge-discharge cycles at 5 A/g.

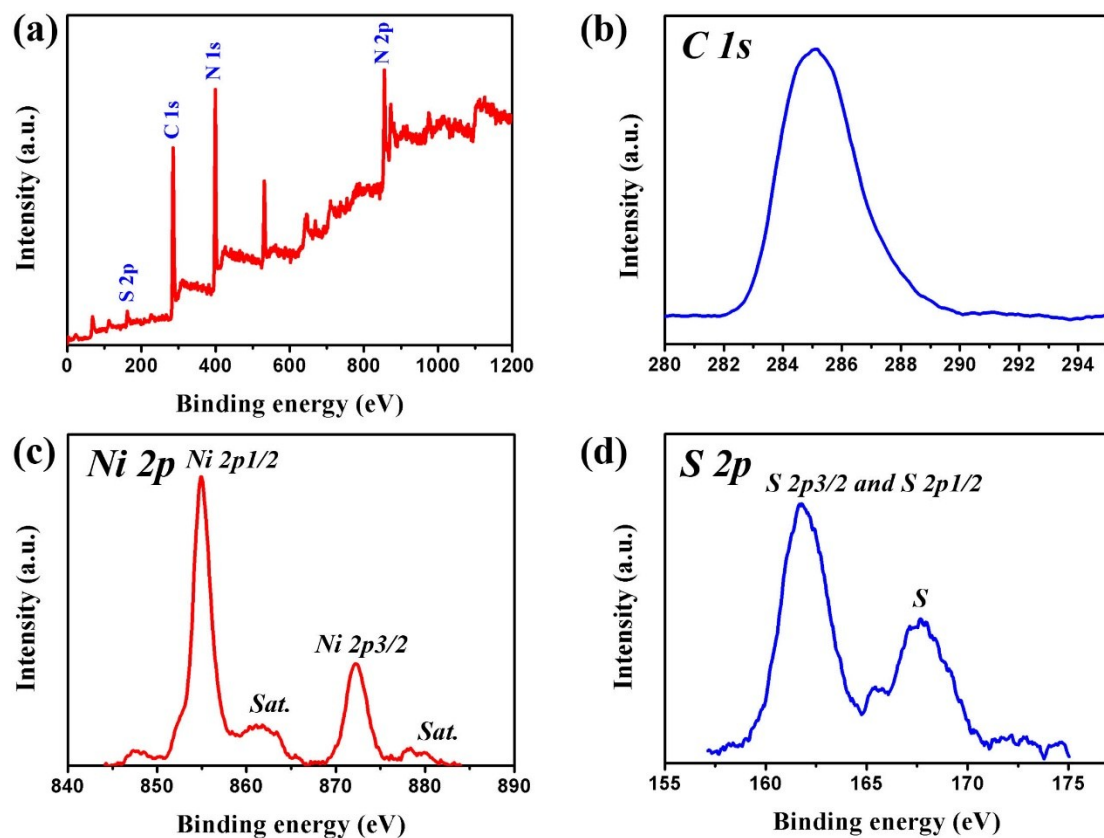

**Fig. S17.** XPS patterns of PM-Ni<sub>x</sub>S<sub>y</sub> electrodes after 100 000 charge-discharge cycles at 5 A/g.

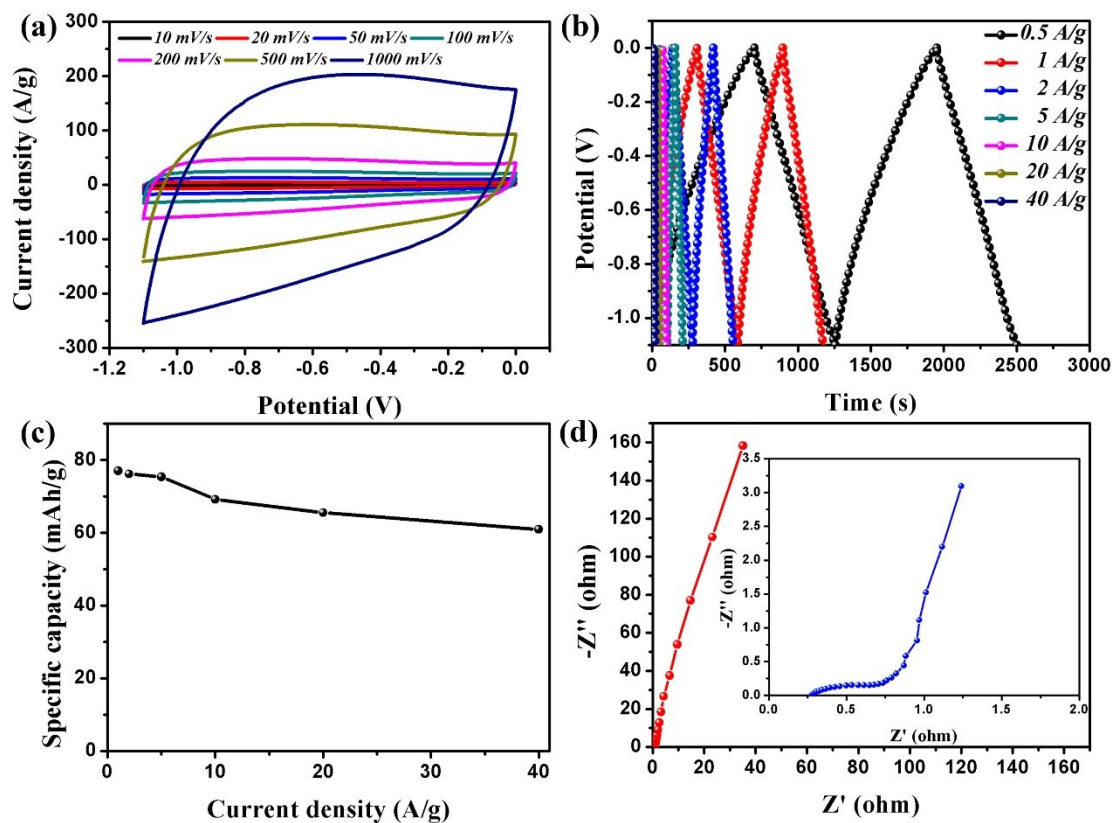

**Fig. S18.** (a) CV curves at scan rates of 10- 1000 mV/s; (b) GCD curves; (c) specific capacity at different current densities; (d) EIS plot of porous graphene microspheres.

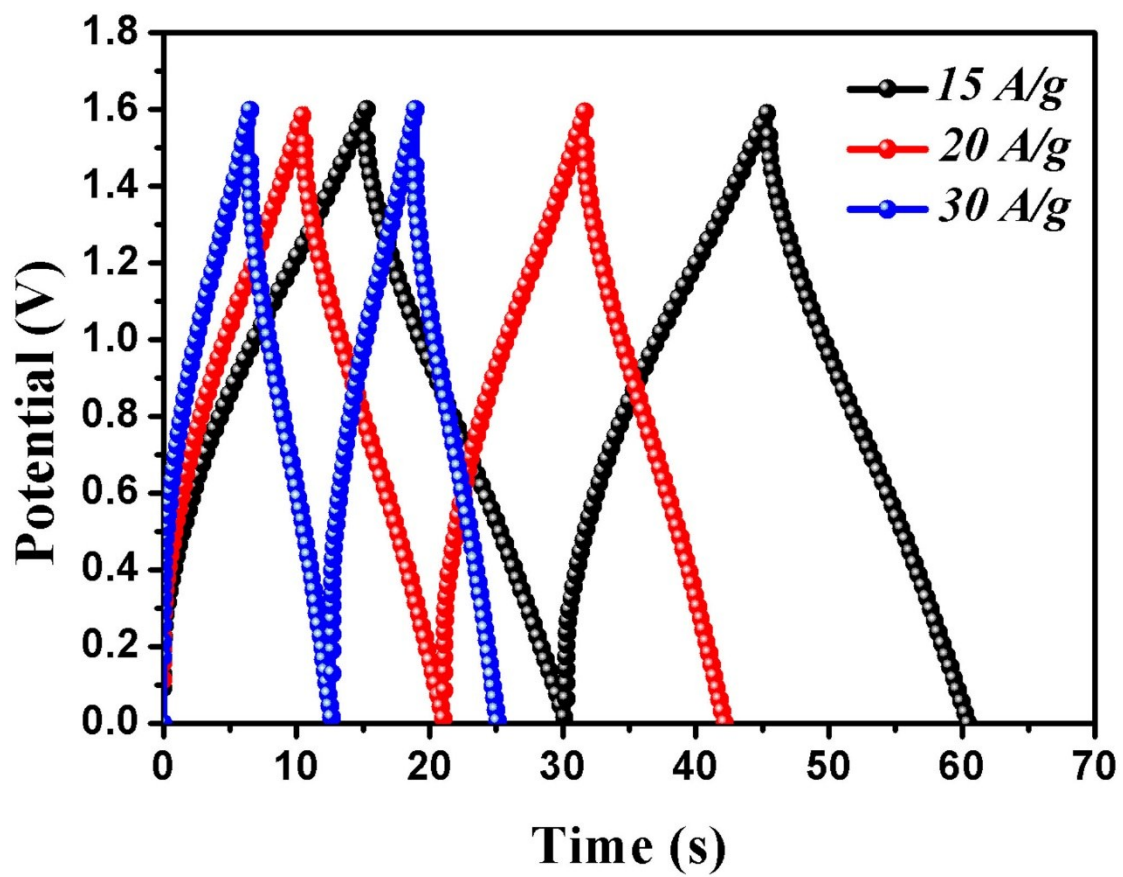

Fig. S19. GCD curves at different current densities of 15-30 A/g of PM-Ni<sub>x</sub>S<sub>y</sub>//PG ASCs.

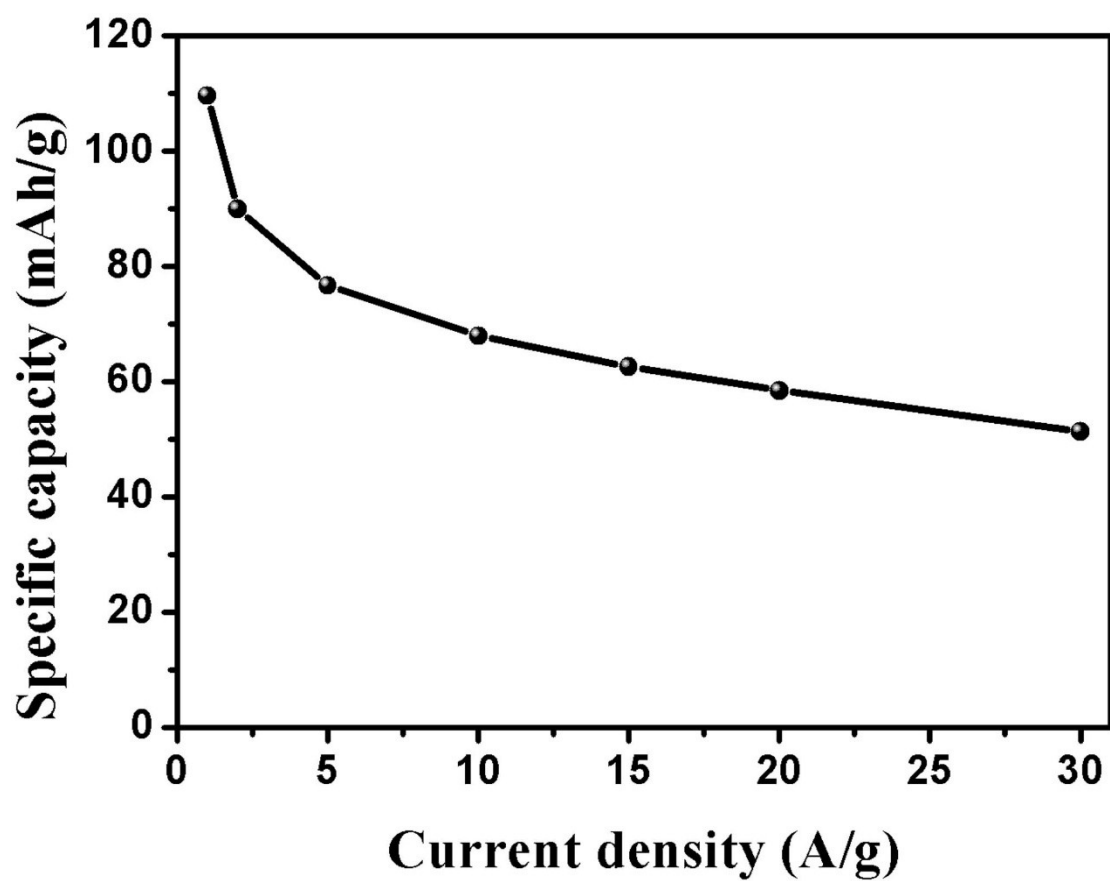

**Fig. S20.** Specific capacity at different current densities of 1-30 A/g of PM-Ni<sub>x</sub>S<sub>y</sub>//PG ASCs.



**Table S1.** Comparison study of the cyclic stability between the PM-Ni<sub>x</sub>S<sub>y</sub> microflowers electrode in this work and previously reported nickel sulfides based materials.

| Materials                                                       | Capacitance (F/g)           | Cyclic stability             | Ref       |
|-----------------------------------------------------------------|-----------------------------|------------------------------|-----------|
| Ni@rGO-Ni <sub>3</sub> S <sub>2</sub>                           | 987.8 (1.5 A/g)             | 97.9% (12 A/g, 3000 cycles)  | [1]       |
| Rod-like NiS <sub>2</sub>                                       | 1020.2 (1 A/g)              | 93.4% (2 A/g, 2000 cycles)   | [2]       |
| NiS microflowers                                                | 1122.7 (1 A/g)              | 97.8% (10 A/g, 1000 cycles)  | [3]       |
| Ni <sub>3</sub> S <sub>4</sub> -MoS <sub>2</sub> heterojunction | 985.21 (1 A/g)              | 85% (10 A/g, 20000 cycles)   | [4]       |
| NiS <sub>2</sub> /ZnS                                           | 1198 (1 A/g)                | 87% (5 A/g, 1000 cycles)     | [5]       |
| NiS/Ni <sub>3</sub> S <sub>4</sub> nanosheets                   | 2070.0 (2.5 A/g)            | 86% (3 A/g, 10000 cycles)    | [6]       |
| Ni <sub>3</sub> S <sub>2</sub> /MWCNT                           | 1024 (0.8 A/g)              | 80% (3.2 A/g, 1000 cycles)   | [7]       |
| Ni <sub>3</sub> S <sub>4</sub> @MoS <sub>2</sub>                | 1440.9 (2 A/g)              | 90.7% (10 A/g, 3000 cycles)  | [8]       |
| Honeycomb-like NiS <sub>2</sub> /NiO                            | 2251 (1 A/g)                | 78% (5 A/g, 2000 cycles)     | [9]       |
| Co-Mo-O/Ni <sub>3</sub> S <sub>2</sub> /NF                      | 340 (2 A/g)                 | 95.7% (2 A/g, 2000 cycles)   | [10]      |
| Co-doped NiS                                                    | 2141.9 (2 A/g)              | 75.3% (10 A/g, 3000 cycles)  | [11]      |
| NiCo <sub>2</sub> S <sub>4</sub> /carbon sponge                 | 1093 (0.5 A/g)              | 83% (8A/g, 8000 cycles)      | [12]      |
| Ni <sub>x</sub> S <sub>y</sub> @CoS polyhedrons                 | 2091.4 (2 A/g)              | 85.2% (5 A/g, 2000 cycles)   | [13]      |
| NiS <sub>2</sub> /CoS <sub>2</sub>                              | 954.3 (1 A/g)               | 99.9% (5 A/g, 1000 cycles)   | [14]      |
| NiS <sub>x</sub> @NCV microcapsules                             | 1600 (1 A/g)                | 94.36% (1 A/g, 5000 cycles)  | [15]      |
| PM-Ni <sub>x</sub> S <sub>y</sub> microflowers                  | 2331.3 (323.8 mAh/g, 2 A/g) | 98.9% (5 A/g, 100000 cycles) | This work |

**Table S2.** Comparison study of the cyclic stability, energy density and power density

between the PM-Ni<sub>x</sub>S<sub>y</sub>//PG ASCs in this work and previously reported nickel sulfides based SCs.

| Device                                                                        | Cyclic stability                                 | Energy density (W h/kg) | Power density (kW/kg) | Ref       |
|-------------------------------------------------------------------------------|--------------------------------------------------|-------------------------|-----------------------|-----------|
| Ni@rGO-Co <sub>3</sub> S <sub>4</sub> //Ni@rGO-Ni <sub>3</sub> S <sub>2</sub> | 96.2% after 3000 cycles (12 A/g)                 | 55.16                   | 0.975                 | [1]       |
| Rod-like NiS <sub>2</sub> //rGO                                               | 84.1% after 4000 cycles (2 A/g)                  | 32.76                   | 0.954                 | [2]       |
| NiS-NF//AC                                                                    | 90.6% after 1000 cycles (25 mA/cm <sup>2</sup> ) | 38.4                    | 0.1666                | [16]      |
| Ni <sub>3</sub> S <sub>4</sub> -MoS <sub>2</sub> heterojunction//AC           | 86.2% after 10000 cycles (10 A/g)                | 58.43                   | 0.38595               | [3]       |
| Co-Mo-O/Ni <sub>3</sub> S <sub>2</sub> /NF                                    | 90.2% after 3000 cycles (12 A/g)                 | 57.9                    | 1.1                   | [10]      |
| Co-doped NiS//AC                                                              | 85.1% after 4000 cycles (10 A/g)                 | 54.9                    | 1.5154                | [11]      |
| NiS <sub>2</sub> -CoS <sub>2</sub> //AC                                       | 99.1% after 4000 cycles (2 A/g)                  | 29.3                    | 0.7                   | [14]      |
| Ni <sub>3</sub> S <sub>2</sub> /MWCNT-NC//AC                                  | 90% after 5000 cycles (4 A/g)                    | 19.8                    | 0.798                 | [7]       |
| Ni <sub>3</sub> S <sub>2</sub> @β-NiS//AC                                     | 97.8% after 10000 cycles (5 A/g)                 | 55.1                    | 0.9259                | [17]      |
| NiS <sub>2</sub> /ZnS//AC                                                     | 88.7% after 1500 cycles (5 A/g)                  | 28                      | 0.7489                | [5]       |
| Ni <sub>3</sub> S <sub>2</sub> /CNF//CNF                                      | 97% after 2500 cycles (100 mV/s)                 | 25.8                    | 0.425                 | [18]      |
| R-NiS/rGO//C/NG-A                                                             | 93.2% after 10000 cycles (20 A/g)                | 93                      | 0.962                 | [19]      |
| NiS <sub>x</sub> @NCV//NPC                                                    | 92.4% after 5000 cycles (1 A/g)                  | 48.02                   | 0.8                   | [15]      |
| PM-Ni <sub>x</sub> S <sub>y</sub> //PG                                        | 97.6% after 100000 cycles (5 A/g)                | 88                      | 0.81                  | This work |

**Table S3.** The rated voltage and power of the used equipment in this work.

| Equipment               | Rated voltage/V | Rated power/W |
|-------------------------|-----------------|---------------|
| LED lamp                | 1.5             | 3             |
| Electronic motor        | 2               | 5             |
| Miniature game machine  | 1.5             | 4             |
| Colorful illuminations  | 3               | 5             |
| Electronic game machine | 3               | 7             |

## Notes and references

1. D. Ghosh and C. K. Das, *Acs Appl. Mater. Interfaces*, 2015, **7**, 1122-1131.
2. Y. Ruan, J. Jiang, H. Wan, X. Ji, L. Miao, L. Peng, B. Zhang, L. Lv and J. Liu, *J. Power Sources*, 2016, **301**, 122-130.
3. B. Guan, Y. Li, B. Yin, K. Liu, D. Wang, H. Zhang and C. Cheng, *Chem. Eng. J.*, 2017, **308**, 1165-1173.
4. W. Luo, G. Zhang, Y. Cui, Y. Sun, Q. Qin, J. Zhang and W. Zheng, *J. Mater. Chem. A*, 2017, **5**, 11278-11285.
5. G. C. Li, M. Liu, M. K. Wu, P. F. Liu, Z. Zhou, S. R. Zhu, R. Liu and L. Han, *Rsc Adv.*, 2016, **6**, 103517-103522.
6. Y. Li, J. Xu, H. Liu, Y. Liu, M. Wang, J. Li and H. Cui, *J. Sol-Gel Sci. Techn.*, 2018, **87**, 546-553.
7. C. S. Dai, P. Y. Chien, J. Y. Lin, S. W. Chou, W. K. Wu, P. H. Li, K. Y. Wu and T. W. Lin, *Acs Appl. Mater. Interfaces*, 2013, **5**, 12168-12174.
8. Y. Zhang, W. Sun, X. Rui, B. Li, H. T. Tan, G. Guo, S. Madhavi, Y. Zong and Q. Yan, *Small*, 2015, **11**, 3694-3702.
9. D. Zhang, X. Zhou, K. Ye, Y. Li, C. Song, K. Cheng, D. Cao, G. Wang and Q. Li, *Electrochim. Acta*, 2015, **173**, 209-214.
10. K. Tao, Y. Gong, Q. Zhou and J. Lin, *Electrochim. Acta*, 2018, **286**, 65-76.
11. S. Xie, J. Gou, B. Liu and C. Liu, *Inorg. Chem. Front.*, 2018, **5**, 1218-1225.
12. X. Liang, K. Nie, X. Ding, L. Dang, J. Sun, F. Shi, H. Xu, R. Jiang, X. He, Z. Liu and Z. Lei, *Acs Appl. Mater. Interfaces*, 2018, **10**, 10087-10095.
13. R. Gao, Q. Zhang, F. Soyekwo, C. Lin, R. Lv, Y. Qu, M. Chen, A. Zhu and Q. Liu, *Electrochim. Acta*, 2017, **237**, 94-101.
14. H. Zhang, B. Guan, J. Gu, Y. Li, C. Ma, J. Zhao, T. Wang and C. Cheng, *Rsc Adv.*, 2016, **6**, 58916-58924.
15. C. Yang, M. Shi, X. Song, X. Zhao, I. Zhao, J. Liu, P. Zhang and L. Gao, *J. Mater. Chem. A*, 2018, **6**, 5724.
16. L. Yu, B. Yang, Q. Liu, J. Liu, X. Wang, D. Song, J. Wang and X. Jing, *J. Electroanal. Chem.*, 2015, **739**, 156-163.
17. W. Li, S. Wang, L. Xin, M. Wu and X. Lou, *J. Mater. Chem. A*, 2016, **4**, 7700-7709.
18. Y. Wendan, L. Worong, S. Xiaofeng, H. Zhaoxia, L. Ruchun and Y. Dingsheng, *J. Power Sources*, 2014, **272**, 137-143.
19. C. Qu, L. Zhang, W. Meng, Z. Liang, B. Zhu, D. Dang, S. Dai, B. Zhao, H. Tabassum and S. Gao, *J. Mater. Chem. A*, 2018, **6**.
